# Supplementary material
Source: publisher site journal article supplement (http://study.sagepub.com/sites/default/files/appendix_1b_visual_sequential_memory_symbols.docx)

Appendix 1B: Visual Sequential Memory: Symbols

|  | 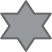 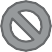 | 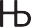 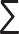 | 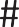 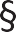 |
| --- | --- | --- | --- |
| 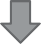 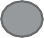 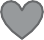 | 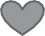 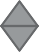 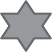 |  |  |
| 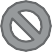 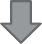 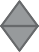 | 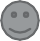 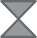 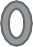 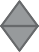 | 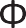 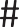 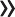 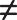 | 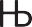 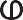 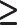 |
|  | 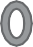 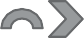 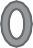 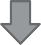 | 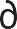 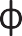 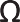 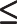 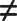 | 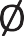 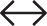 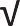 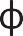 |
|  | 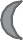 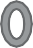 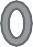 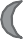 | 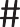 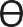 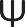 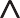 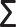 | 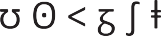 |
|  | 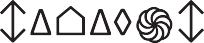 | 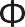 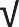 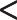 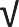 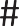 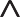 | 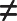 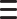 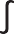 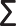 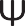 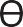 |

Supplement: Supplementary file 1 [file appendix_1b_visual_sequential_memory_symbols.docx]
